# Supplementary material for: Algae-laden water treatment with ultrafiltration: effects of moderate oxidation by Fe(ii)/permanganate on hydraulically irreversible fouling and deposition of iron and manganese oxides
Source: Royal Society of Chemistry journal article supplement (doi:10.1039/d0ew00833h), 2020-10-23
Supplement: d0ew00833h1.pdf [file d0ew00833h1.pdf]

Algae-laden water treatment with ultrafiltration: effects of moderate oxidation by  
Fe(II)/permanganate on hydraulically irreversible fouling and deposition of iron and  
manganese oxides

Supplementary information

Fangshu Qu<sup>a,b</sup>, Zhimeng Yang<sup>a</sup>, Huarong Yu<sup>a,b,\*</sup>, Hong Zhou<sup>a</sup>, Gongduan Fan<sup>c</sup>, Junguo He<sup>a,b</sup>, Hongwei Rong<sup>a,b,\*\*</sup>

<sup>a</sup> Key Laboratory for Water Quality and Conservation of the Pearl River Delta, Guangzhou University, Guangzhou,  
510006 , P.R. China

<sup>b</sup> College of Civil Engineering, Guangzhou University, Guangzhou, 510006 , P.R. China

<sup>c</sup> College of Civil Engineering, Fuzhou University, Fuzhou, 350116, China

## 1. Composition of the BG11 medium

Table S1 Ingredients of BG-11 medium

| Chemicals                                            | Concentration<br>(mg/L) |
|------------------------------------------------------|-------------------------|
| NaNO <sub>3</sub>                                    | 1500.00                 |
| K <sub>2</sub> HPO <sub>4</sub>                      | 40.00                   |
| MgSO <sub>4</sub> .7H <sub>2</sub> O                 | 75.00                   |
| CaCl <sub>2</sub> . 2H <sub>2</sub> O                | 36.00                   |
| Citric acid                                          | 6.00                    |
| Ammonium ferric citrate                              | 6.00                    |
| EDTANa <sub>2</sub>                                  | 1.00                    |
| Na <sub>2</sub> CO <sub>3</sub>                      | 20.00                   |
| H <sub>3</sub> BO <sub>3</sub>                       | 2.86                    |
| MnCl <sub>2</sub> .4H <sub>2</sub> O                 | 1.86                    |
| Na <sub>2</sub> MoO <sub>4</sub> .2H <sub>2</sub> O  | 0.22                    |
| CuSO <sub>4</sub> .5H <sub>2</sub> O                 | 0.08                    |
| Co(NO <sub>3</sub> ) <sub>2</sub> .6H <sub>2</sub> O | 0.05                    |

## 2. Preparation of algae-laden water

The algae-laden water was prepared via four steps. Firstly, the concentration of the harvested algae suspension was determined using a blood counting chamber. Secondly, the absorbance of algae suspension was measured in a visible spectrum range (400-700 nm) and a characteristic absorbance peak was found at a wavelength of 685 nm. Thirdly, a calibration between cell concentration and optical density at 685 nm ( $OD_{685}$ ) was established (Fig. R1(a)). Finally, the dilution factor can be calculated with the initial algae solution and the objective algae solution ( $2.0 \times 10^6$  cells  $mL^{-1}$ ).

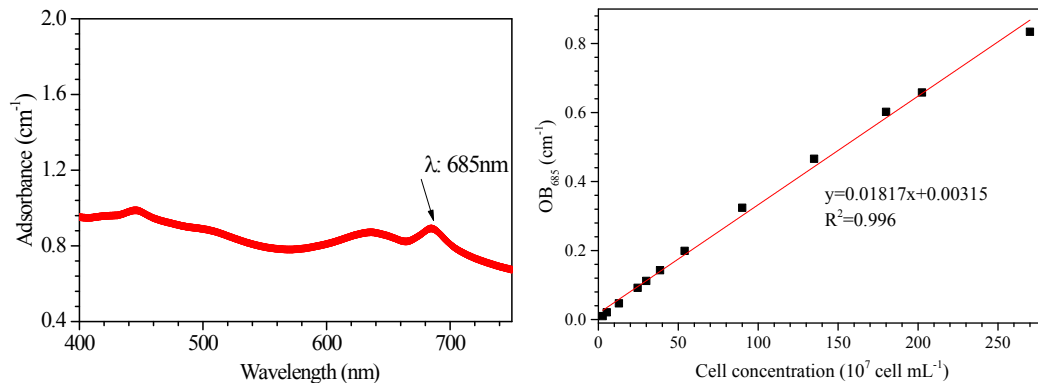

Fig. S1 Absorbance spectrum of algae suspension (a) and calibration of algae concentration and  $OD_{685}$  (b)

### 3. Effects of permanganate doses on the membrane fouling during filtration of the algae-laden water

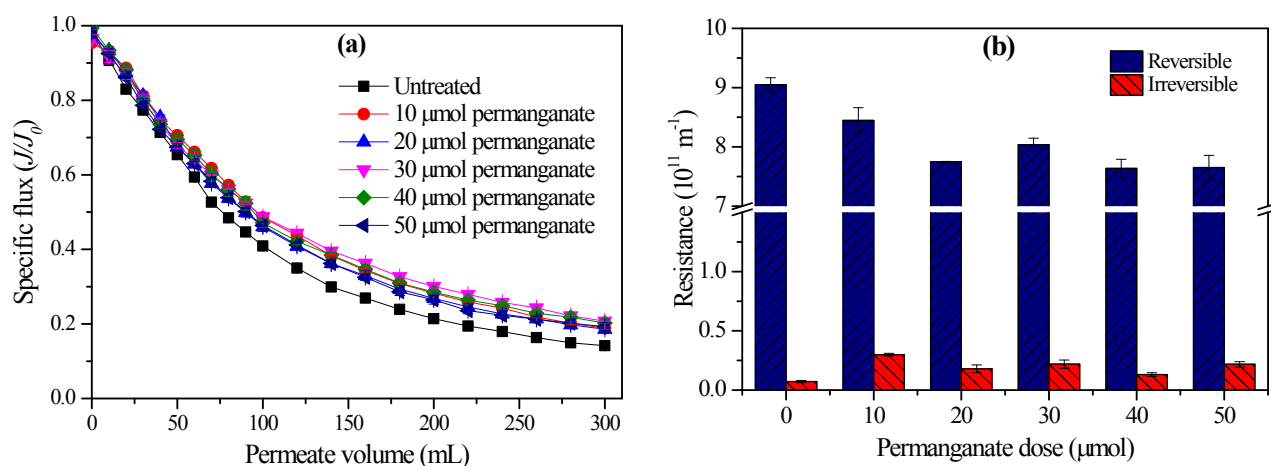

Fig.S2 Effects of permanganate doses on the membrane fouling during filtration of the algae-laden water: Flux decline (a) and fouling resistances (b)

4. Effects of Fe( II ) doses on the membrane fouling during filtration of the algae-laden water:

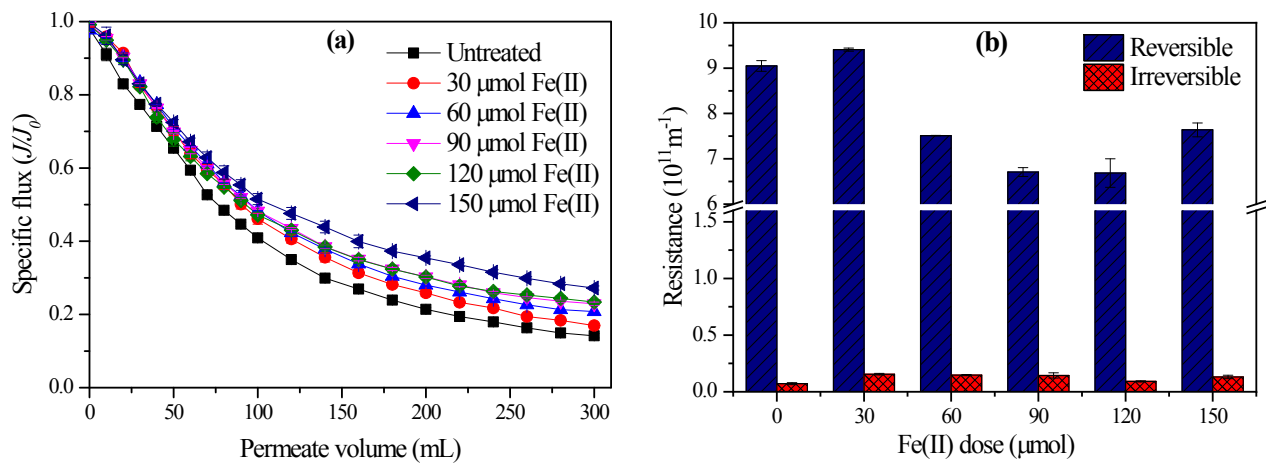

Fig. S3 Effects of Fe( II ) doses on the membrane fouling during filtration of the algae-laden water: (a) Flux decline and (b) fouling resistances

## 5. EDS spectra of the membranes fouled during the algae-laden water

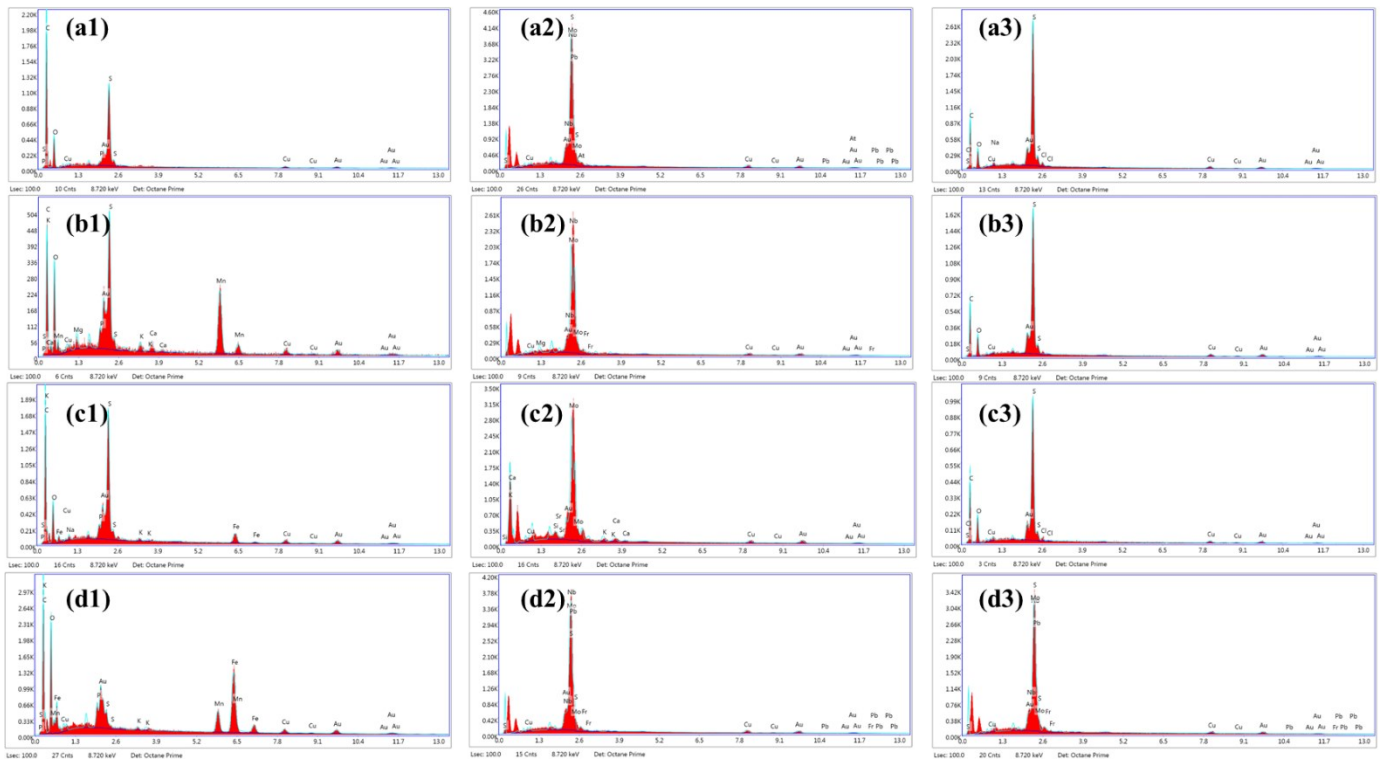

Fig. 4 EDS spectra of the membranes fouled by the algae-laden water: (a) untreated , (b) permanganate only (c) Fe(II) only and (d) Fe(II)/permanganate. 1, 2 and 3 represent the fouled membrane, the physical cleaned membrane and the chemically cleaned membrane. The doses of Mn(V) and Fe(II) were 50  $\mu\text{mol}$  and 150  $\mu\text{mol}$ , respectively.

## 6. Fluorescent EEM spectra of UF permeate at increasing doses of permanganate and Fe(II) /UF

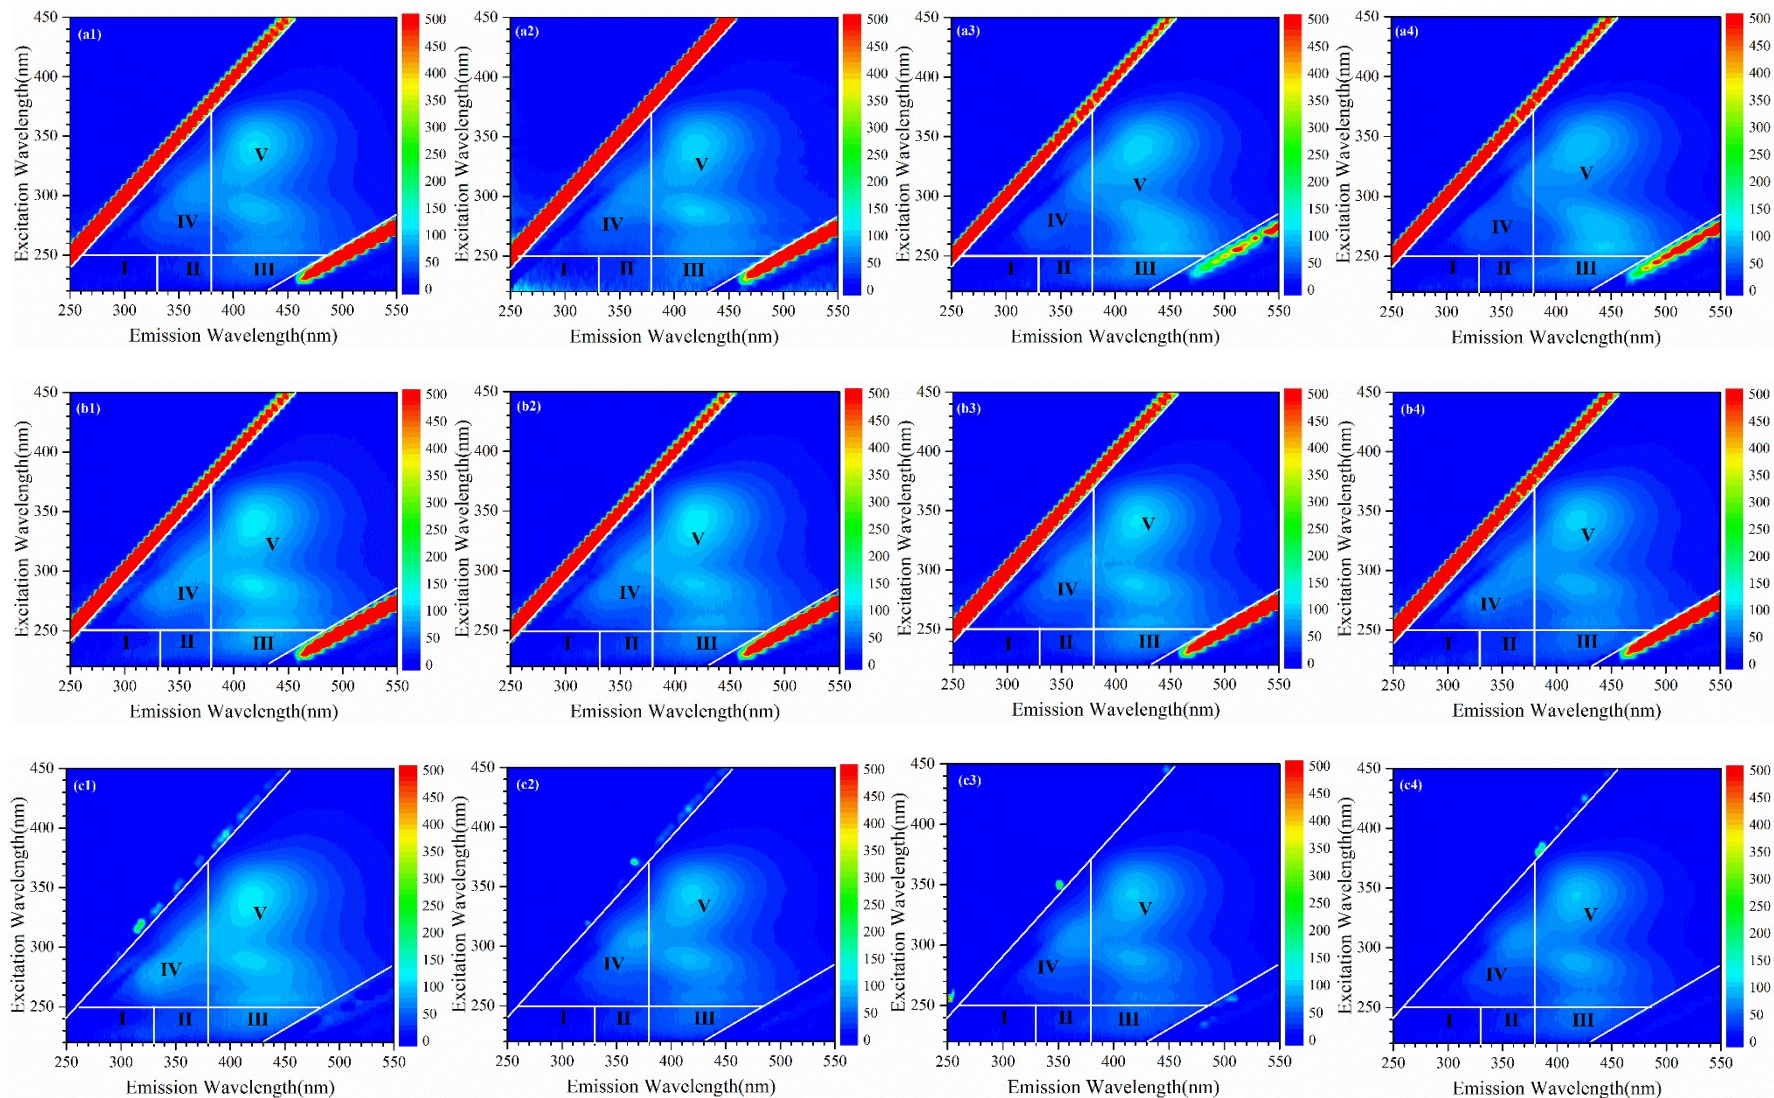

Fig.S5 Fluorescent EEM spectra of UF permeate in the treatment of algae-laden water with hybrid processes: (a) permanganate oxidation, (b) Fe(II) coagulation and (c) Fe(II)/ permanganate. For permanganate, 1, 2, 3, 4 represent 10, 20, 30 and 40  $\mu\text{mol}$ , respectively. For Fe(II), 1, 2, 3, 4 represent 30, 60, 90 and 120  $\mu\text{mol}$ , respectively.
